# Supplementary material
Source: publisher figshare collection journal article supplement (https://frontiersin.figshare.com/ndownloader/files/29098977)
Supplement: Supplementary file 1 [file 29098977]

**Table S.3: Effect of ideology conditional on GDP growth on satisfaction with democracy and political trust. Multi-level models**

|  | (A3.1) | (A3.2) | (A3.3) | (A3.4) | (A3.5) | (A3.6) | (A3.7) | (A3.8) |
| --- | --- | --- | --- | --- | --- | --- | --- | --- |
|  | Satisfaction with democracy | Trust in politicians | Trust in parliament | Trust in political parties | Satisfaction with democracy | Trust in politicians | Trust in parliament | Trust in political parties |
|  |  |  |  |  |  |  |  |  |
| Ideology | 0.0902*** | 0.0661*** | 0.0668*** | 0.0512*** | 0.0941*** | 0.0678*** | 0.0682*** | 0.0523*** |
|  | (0.00245) | (0.00239) | (0.00254) | (0.00255) | (0.00250) | (0.00245) | (0.00260) | (0.00259) |
| Incr unemployment | -0.207** | -0.245*** | -0.232*** | -0.261*** | -0.125 | -0.209** | -0.201** | -0.234*** |
|  | (0.0888) | (0.0851) | (0.0801) | (0.0899) | (0.0895) | (0.0858) | (0.0810) | (0.0906) |
| Interaction |  |  |  |  | -0.0168*** | -0.00730*** | -0.00625** | -0.00547** |
|  |  |  |  |  | (0.00240) | (0.00235) | (0.00250) | (0.00233) |
| Education | 0.0407*** | 0.0386*** | 0.0699*** | 0.0251*** | 0.0407*** | 0.0386*** | 0.0699*** | 0.0251*** |
|  | (0.00130) | (0.00127) | (0.00135) | (0.00134) | (0.00130) | (0.00127) | (0.00135) | (0.00134) |
| Unemployed | -0.518*** | -0.370*** | -0.485*** | -0.344*** | -0.519*** | -0.370*** | -0.485*** | -0.344*** |
|  | (0.0219) | (0.0214) | (0.0228) | (0.0225) | (0.0219) | (0.0214) | (0.0228) | (0.0225) |
| Gender | -0.185*** | 0.0110 | -0.183*** | -0.0136 | -0.185*** | 0.0113 | -0.183*** | -0.0134 |
|  | (0.0101) | (0.00984) | (0.0105) | (0.0105) | (0.0101) | (0.00984) | (0.0105) | (0.0105) |
| Age | -0.00102*** | 0.00132*** | -0.000507 | -0.00200*** | -0.00102*** | 0.00132*** | -0.000505 | -0.00200*** |
|  | (0.000304) | (0.000297) | (0.000316) | (0.000316) | (0.000304) | (0.000297) | (0.000316) | (0.000316) |
| Married | 0.0923*** | 0.0426*** | 0.0791*** | -0.0127 | 0.0923*** | 0.0425*** | 0.0791*** | -0.0127 |
|  | (0.0107) | (0.0104) | (0.0111) | (0.0111) | (0.0107) | (0.0104) | (0.0111) | (0.0111) |
|  |  |  |  |  |  |  |  |  |
| Observations | 182,283 | 183,802 | 182,335 | 154,778 | 182,283 | 183,802 | 182,335 | 154,778 |
| Level-2 Units | 109 | 109 | 109 | 92 | 109 | 109 | 109 | 92 |

Constant and Country and wave varying intercepts not shown. Standard errors in parentheses, *** p<0.01, ** p<0.05, * p<0.1
